# Supplementary material for: Highly Sensitive Marker Panel for Guidance in Lung Cancer Rapid Diagnostic Units
Source: PubMed Central journal article supplement (PMC5259733; doi:10.1038/srep41151), 2017-01-24
Supplement: srep41151-s1.pdf [file srep41151-s1.pdf]

**Title: Highly Sensitive Marker Panel for Guidance in Lung Cancer Rapid Diagnostic Units**

**Authors:** Sonia Blanco-Prieto, Loretta De Chiara, Mar Rodríguez-Girondo, Lorena Vázquez-Iglesias, Francisco Javier Rodríguez-Berrocal, Alberto Fernández-Villar, María Isabel Botana-Rial, María Páez de la Cadena

**SUPPLEMENTARY FIGURE S1: Annotated Heatmap based on Pearson Correlation of the Studied Molecular Markers in the Training Set**

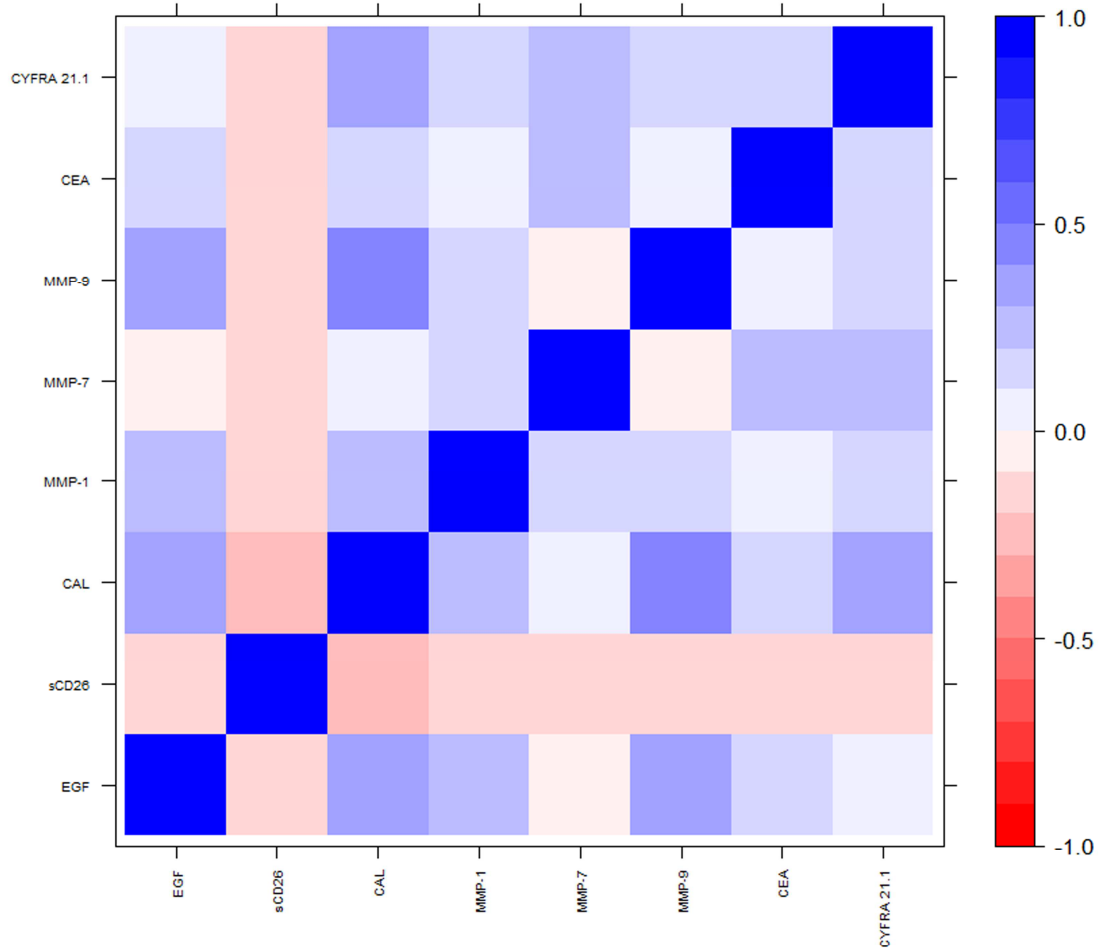

**SUPPLEMENTARY TABLE S1. Association of Markers with Gender, Age and Smoking in the Training Set**

| Marker                       | Gender <sup>a</sup>          |                              | <i>P</i> <sup>b</sup> | Age <sup>a</sup>             |                              | <i>P</i> <sup>b</sup> | Smoking <sup>a</sup>         |                              | <i>P</i> <sup>b</sup> |
|------------------------------|------------------------------|------------------------------|-----------------------|------------------------------|------------------------------|-----------------------|------------------------------|------------------------------|-----------------------|
|                              | Male (n=101)                 | Female (n=39)                |                       | ≤65 years (n=73)             | >65 years (n=67)             |                       | Yes (n=112)                  | No (n=28)                    |                       |
| <b>EGF</b><br>(pg/mL)        | 438.04<br>40.13-1716.30      | 347.10<br>116.45-1187.06     | 0.490                 | 433.91<br>40.75-1176.15      | 431.55<br>40.13-1716.30      | 0.995                 | 465.81<br>40.13-1716.30      | 334.20<br>98.01-727.55       | 0.028                 |
| <b>sCD26</b><br>(ng/mL)      | 380.00<br>136.00-1192.00     | 453.00<br>122.00-945.00      | 0.018                 | 470.00<br>159.00-1092.00     | 361.00<br>122.00-1192.00     | 0.001                 | 383.50<br>136.00-1192.00     | 458.00<br>122.00-102.00      | 0.125                 |
| <b>CAL</b><br>(ng/mL)        | 181.44<br>7.56-438.32        | 199.22<br>33.13-430.40       | 0.831                 | 181.48<br>7.56-438.32        | 190.39<br>33.13-430.40       | 0.501                 | 190.84<br>7.56-438.32        | 158.14<br>33.13-430.40       | 0.300                 |
| <b>MMP-1</b><br>(pg/mL)      | 6060.28<br>1207.70-41668.33  | 5862.96<br>1186.61-22436.23  | 0.258                 | 5988.68<br>1186.61-22595.70  | 5916.00<br>1207.70-41668.33  | 0.483                 | 6061.80<br>1186.61-41668.33  | 5317.19<br>1207.70-22595.70  | 0.105                 |
| <b>MMP-7</b><br>(pg/mL)      | 24324.18<br>5026.14-79977.27 | 22443.39<br>5383.18-50903.24 | 0.285                 | 21936.90<br>5026.14-53466.87 | 27755.14<br>5383.18-79977.27 | 0.001                 | 25145.77<br>5026.14-79977.27 | 20767.69<br>5383.18-50903.24 | 0.026                 |
| <b>MMP-9</b><br>(ng/mL)      | 261.66<br>21.06-3611.59      | 215.34<br>52.79-3300.50      | 0.154                 | 224.96<br>21.06-3611.59      | 261.66<br>52.79-1526.50      | 0.783                 | 261.63<br>21.06-3611.59      | 183.55<br>52.79-3300.50      | 0.077                 |
| <b>CEA</b><br>(pg/mL)        | 1261.73<br>141.16-136039.19  | 1050.94<br>187.02-82300.26   | 0.478                 | 1007.82<br>161.95-82300.26   | 1458.80<br>141.16-136039.19  | 0.094                 | 1356.80<br>141.16-136039.19  | 828.39<br>170.84-102098.59   | 0.061                 |
| <b>CYFRA 21.1</b><br>(pg/mL) | 1250.35<br>0.00-173410.17    | 475.86<br>0.00-35365.75      | 0.096                 | 446.05<br>0.00-43641.44      | 1932.84<br>0.00-173410.17    | 0.004                 | 1155.57<br>0.00-173410.17    | 500.10<br>0.00-19314.33      | 0.202                 |

<sup>a</sup> Median and range values provided

<sup>b</sup> Mann-Whitney U test

## SUPPLEMENTARY MATERIAL S1: Details of Classification Algorithm based on Lasso Logistic Regression.

We derived a classification rule based on a multivariate combination of the studied markers based on logistic Lasso regression<sup>1</sup>. The general aim is to build a decision rule to predict a binary outcome  $\mathbf{y}$  in terms of a set of  $p$  (molecular) markers  $\mathbf{X}=(X_1, \dots, X_p)$ , using a training sample of size  $n$ . For each observation  $i$ , we estimate its class membership as  $\hat{y}_i = I(\hat{p}_i > \hat{c})$ ,  $\hat{p}_i = \hat{P}(y_i = 1 | x_{1i}, \dots, x_{pi})$ , where  $\hat{p}_i$  are the estimated membership probabilities and  $\hat{c}$  is the estimated optimal cut-off point based on  $\hat{p}_i$  and a given optimality criterion. We consider a logistic lasso regression for the simultaneous estimation of  $\hat{p}_i$  and  $\hat{c}$  in terms of the set of predictors  $\mathbf{X}$ , through the estimation of the regression coefficients  $\boldsymbol{\beta} = (\beta_1, \dots, \beta_p)$  corresponding to each of the  $p$  considered markers. Specifically,  $\text{logit}(\hat{p}_i) = \log\left(\frac{\hat{p}_i}{1-\hat{p}_i}\right) = \beta_0 + x_{i1}\beta_1 + \dots + x_{ip}\beta_p$  and the estimation of  $\boldsymbol{\beta} = (\beta_1, \dots, \beta_p)$  is conducted by maximizing the penalized log-likelihood

$$\sum_{i=1}^n [y_i \log(\hat{p}_i) + (1 - y_i) \log(1 - \hat{p}_i)] - \Lambda \text{pen}(\boldsymbol{\beta})$$

The penalty parameter  $\Lambda$  regularizes the traditional maximum likelihood coefficients by shrinking large coefficients in order to control the bias-variance trade-off. We use a Lasso-type<sup>1</sup> penalty, with  $\text{pen}(\boldsymbol{\beta}) = \|\boldsymbol{\beta}\|_1 = \sum_{j=1}^p |\beta_j|$ , which allows for variable selection since some of the resulting coefficients can be exactly zero. In practice, the final estimated regression coefficients  $\boldsymbol{\beta}$  are determined by the choice of the optimal (in some sense)  $\Lambda$ ,  $\Lambda_{opt}$ .

In our algorithm, we simultaneously chose the penalty parameter  $\Lambda_{opt}$  and cut-off point  $\hat{c}$  which provide the classification rule with maximum specificity, given a fixed value of

sensitivity equal to 95%, using 10-fold cross validation in the training set. For each possible value of the penalty parameter (we considered a grid of 170 values of  $\Lambda$  from 0.001 to 0.17), we obtain the corresponding set of regression coefficients in each of the 10 partitions of the training set (leaving aside 1/10 of the training set at each time), and we apply the resulting estimated coefficients to the out-of-sample data, obtaining case probability scores  $\hat{p}_i^\Lambda$  for each observation of the training set and possible value of  $\Lambda$ . Each of these 170 scores were subsequently dichotomized to guarantee the desired level of sensitivity 95 %, providing  $\hat{c}_1^{\Lambda^1}, \dots, \hat{c}_1^{\Lambda^{170}}$  as possible optimal cut-off points, with different level of specificity. Finally, we chose the penalty parameter  $\Lambda_{opt}$  whose corresponding  $\hat{c}_1^{\Lambda_{opt}}$  maximized the specificity.

The algorithm was implemented using the R program (Wirtschafts Universität, Wien, Austria) and using the package *glmnet*<sup>2</sup> for Lasso regularization.

In our case, we considered 8 molecular markers and three extra clinical markers (age, gender and smoking) that entered the model without penalization ( $pen(\boldsymbol{\beta}) = \|\boldsymbol{\beta}\|_1 = \sum_{j=1}^p |\beta_j|$  does not include the regression coefficients corresponding to age, gender and smoking).

The final classification rule corresponds to  $\Lambda_{opt} = 0.059$  and  $\hat{c} = 0.266$ , i.e.  $\hat{y}_i = I(\hat{p}_i > 0.266)$ , where  $\hat{p}_i$  is given by:

$$\begin{aligned} \text{logit}(\hat{p}) = & -12.362 + 1.735\log_{10}CAL + 0.796\log_{10}CEA - 0.067\log_{10}CD26 \\ & + 0.405\log_{10}EGF + 0.035age - 0.250I(\text{gender} = \text{woman}) \\ & + 1.715I(\text{smoking}) \end{aligned}$$

## REFERENCES:

1. Tibshirani, R. Regression shrinkage and selection via the lasso. *J. Royal Statist. Soc. B.* **58**, 267-288 (1996).

2. Friedman, J., Hastie, T. & Tibshirani, R. Regularization Paths for Generalized Linear Models via Coordinate Descent. *Journal of Statistical Software*. **33**, 1-22 (2010).

**SUPPLEMENTARY FIGURE S2: Optimal Lasso Penalization Parameter.**

Specificities corresponding to a fixed value of 95% sensitivity plotted for each possible value of the penalization parameter  $\lambda$  in logistic Lasso regression. Dashed lines indicate the optimal selected penalization parameter ( $\lambda_{opt}$ ) corresponding to the maximum specificity, determined by 10-fold cross-validation.

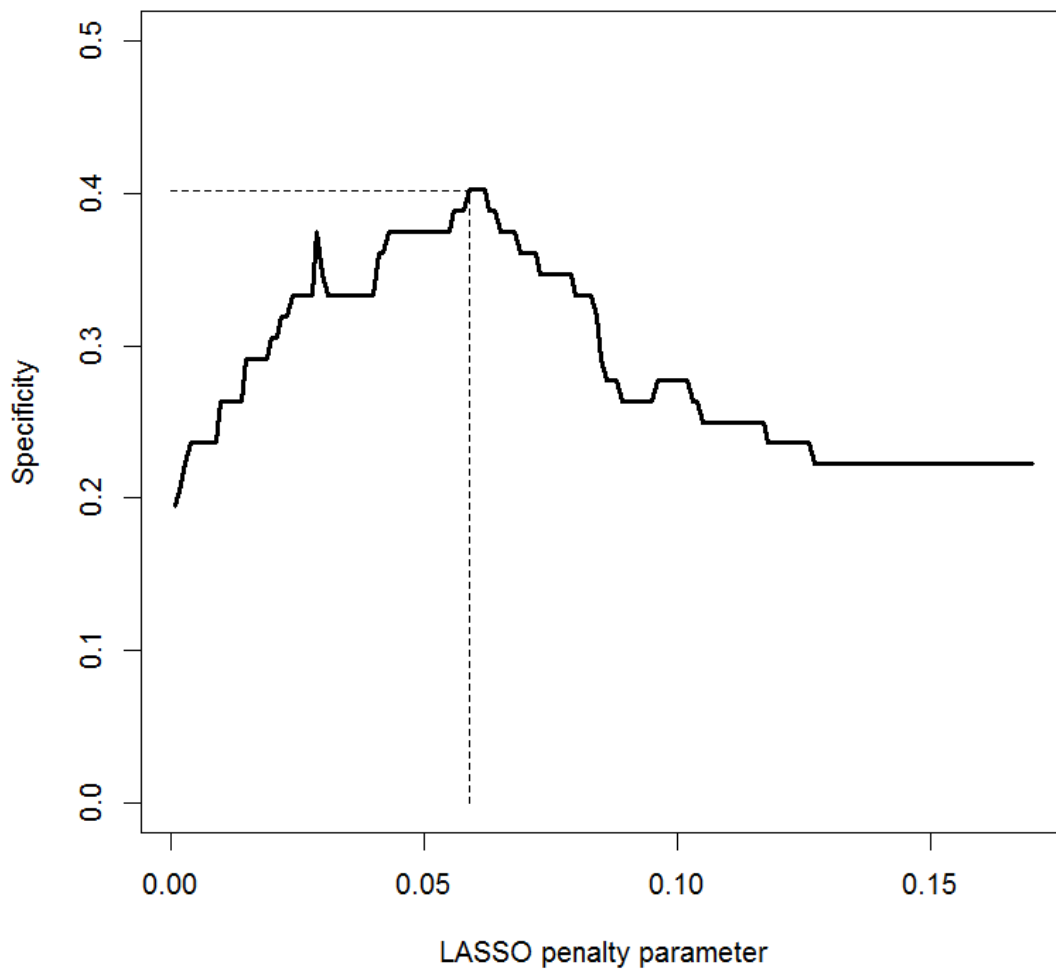

**SUPPLEMENTARY TABLE S2: Diagnostic Measurements of the Proposed 4-Marker Model**

| <b>Criterion</b> | <b>Measurement</b> |
|------------------|--------------------|
| Deviance         | 131.36             |
| AIC              | 145.36             |
| BIC              | 165.95             |

Abbreviations: AIC= Akaike Information Criterion,  
BIC=Bayesian Information Criterion



**SUPPLEMENTARY TABLE S3: Levels of the Serum Markers included in the 4-Marker Panel for the Validation Set**

| Marker        | Case/Control <sup>a</sup> | Median         | Range                   | P <sup>b</sup>   | AUC (95% CI)        |
|---------------|---------------------------|----------------|-------------------------|------------------|---------------------|
| EGF (pg/mL)   | <b>Control</b>            | <b>349.69</b>  | <b>62.63-1160.42</b>    |                  |                     |
|               | Healthy                   | 301.65         | 109.37-519.29           |                  |                     |
|               | Benign                    | 454.32         | 62.63-1160.42           |                  |                     |
|               | <b>LC</b>                 | <b>759.18</b>  | <b>78.37-1375.50</b>    | <b>0.008</b>     | 0.727 (0.576-0.848) |
|               | NSCLC I+II                | 839.81         | 722.66-1176.89          | 0.001            |                     |
|               | NSCLC III+IV              | 574.51         | 170.22-1375.50          | 0.061            |                     |
|               | <b>SCLC</b>               | <b>585.35</b>  | <b>78.37-776.83</b>     | <b>0.783</b>     |                     |
|               | SCLC Limited              | 427.60         | 78.37-776.83            | -                |                     |
| SCLC Extended | 585.35                    | -              | -                       |                  |                     |
| sCD26 (ng/mL) | <b>Control</b>            | <b>456.00</b>  | <b>228.00-1025.00</b>   |                  |                     |
|               | Healthy                   | 605.50         | 308.00-1025.00          |                  |                     |
|               | Benign                    | 434.00         | 228.00-998.00           |                  |                     |
|               | <b>LC</b>                 | <b>380.50</b>  | <b>165.00-846.00</b>    | <b>0.012</b>     | 0.716 (0.564-0.839) |
|               | NSCLC I+II                | 409.00         | 250.00-598.00           | 0.214            |                     |
|               | NSCLC III+IV              | 365.00         | 165.00-778.00           | 0.014            |                     |
|               | <b>SCLC</b>               | <b>306.00</b>  | <b>249.00-846.00</b>    | <b>0.353</b>     |                     |
|               | SCLC Limited              | 547.50         | 249.00-846.00           | -                |                     |
| SCLC Extended | 306.00                    | -              | -                       |                  |                     |
| CAL (ng/mL)   | <b>Control</b>            | <b>117.94</b>  | <b>38.67-247.36</b>     |                  |                     |
|               | Healthy                   | 117.94         | 39.16-247.36            |                  |                     |
|               | Benign                    | 128.61         | 38.67-234.44            |                  |                     |
|               | <b>LC</b>                 | <b>258.33</b>  | <b>111.69-482.89</b>    | <b>&lt;0.001</b> | 0.871 (0.739-0.952) |
|               | NSCLC I+II                | 265.78         | 154.34-426.99           | 0.007            |                     |
|               | NSCLC III+IV              | 261.10         | 126.50-482.89           | <0.001           |                     |
|               | <b>SCLC</b>               | <b>190.52</b>  | <b>111.69-374.88</b>    | <b>0.238</b>     |                     |
|               | SCLC Limited              | 243.28         | 111.69-374.88           | -                |                     |
| SCLC Extended | 190.52                    | -              | -                       |                  |                     |
| CEA (pg/mL)   | <b>Control</b>            | <b>764.77</b>  | <b>236.07-4616.82</b>   |                  |                     |
|               | Healthy                   | 764.77         | 236.07-4203.63          |                  |                     |
|               | Benign                    | 788.36         | 354.97-4616.82          |                  |                     |
|               | <b>LC</b>                 | <b>2102.93</b> | <b>374.15-42679.99</b>  | <b>0.003</b>     | 0.759 (0.611-0.873) |
|               | NSCLC I+II                | 1787.12        | 839.29-5201.68          | 0.039            |                     |
|               | NSCLC III+IV              | 2284.68        | 374.15-42679.99         | 0.022            |                     |
|               | <b>SCLC</b>               | <b>5060.04</b> | <b>1097.96-10139.27</b> | <b>0.027</b>     |                     |
|               | SCLC Limited              | 3079.00        | 1097.96-5060.04         | -                |                     |
| SCLC Extended | 10139.27                  | -              | -                       |                  |                     |

Abbreviations: LC=Lung Cancer, NSCLC=Non-Small Cell Lung Cancer, SCLC=Small Cell Lung Cancer

<sup>a</sup> Sample size in validation set: Control n=22 (Healthy n=8, Benign n=14), NSCLC n=21 (Early stage I+II n=6, Late stage III+IV n=15), SCLC n=3 (Limited stage n=2, Extended stage n=1)

<sup>b</sup>Mann-Whitney U test for the comparison between the cancer and control groups, and comparison between NSCLC stratified by early and advanced stage *versus* controls

**SUPPLEMENTARY TABLE S4: Alternative Model Building Procedures based on AIC and BIC Criteria**

|                         | Minimize AIC <sup>a</sup>           |        | Minimize BIC <sup>a</sup> |        |
|-------------------------|-------------------------------------|--------|---------------------------|--------|
|                         | Sn=95%                              | Sn=90% | Sn=95%                    | Sn=90% |
| <b>Markers included</b> | EGF, sCD26, CAL, CEA, CYFRA<br>21.1 |        | EGF, CAL, CEA,            |        |
| <b>Deviance</b>         | 107.86                              |        | 113.50                    |        |
| <b>AIC</b>              | 125.86                              |        | 127.45                    |        |
| <b>BIC</b>              | 152.34                              |        | 148.09                    |        |
| <b>Cut-off 95% Sn</b>   | >0.057                              |        | >0.141                    |        |
| Sn, Sp (%) train        | 95.6, 33.3                          |        | 95.6, 47.2                |        |
| Sn, Sp (%) test         | 99.0, 31.8                          |        | 91.7, 45.4                |        |
| <b>Cut-off 90% Sn</b>   | >0.433                              |        | >0.440                    |        |
| Sn, Sp (%) train        | 89.7, 75.0                          |        | 89.7, 75.0                |        |
| Sn, Sp (%) test         | 91.7, 77.3                          |        | 83.3, 59.1                |        |

Abbreviations: AIC= Akaike Information Criterion, BIC=Bayesian Information Criterion, Sn=Sensitivity, Sp=Specificity

<sup>a</sup> For each of the two fitted models, we calculated two cut-off points based on maximizing the specificity at two different levels of specificity (Sn=95%, Sn=90%). Optimal models were selected using function *dredge* from the R package *MuMIn*

**SUPPLEMENTARY TABLE S5: Patient Demographics and Classification of Lung Cancer**

|                                   |                | TRAINING SET          |                   | VALIDATION SET        |                   |
|-----------------------------------|----------------|-----------------------|-------------------|-----------------------|-------------------|
|                                   |                | Lung Cancer<br>(n=68) | Control<br>(n=72) | Lung Cancer<br>(n=24) | Control<br>(n=22) |
| <b>Gender<sup>a</sup></b>         | <b>Male</b>    | 55 (80.9%)            | 46 (63.9%)        | 20 (83.3%)            | 14 (63.6%)        |
|                                   | <b>Female</b>  | 13 (19.1%)            | 26 (36.1%)        | 4 (16.7%)             | 8 (36.4%)         |
| <b>Age<sup>b</sup></b>            | <b>Median</b>  | 69.5                  | 61                | 64                    | 59.5              |
|                                   | <b>Range</b>   | 47-88                 | 24-87             | 37-86                 | 38-88             |
| <b>Smoking status<sup>c</sup></b> | <b>Yes</b>     | 63 (92.6%)            | 49 (68.1%)        | 20 (83.3%)            | 14 (63.6%)        |
|                                   | <b>No</b>      | 5 (7.4%)              | 23 (31.9%)        | 4 (16.7%)             | 8 (36.4%)         |
| <b>Diagnosis</b>                  | <b>Healthy</b> |                       | 36 (50%)          |                       | 8 (36.4%)         |
|                                   | <b>RI</b>      |                       | 30 (41.7%)        |                       | 11 (50%)          |
|                                   | <b>ILD</b>     |                       | 6 (8.3%)          |                       | 3 (13.6%)         |
|                                   | <b>NSCLC</b>   | 59 (86.8%)            |                   | 21 (87.5%)            |                   |
|                                   | ADC            | 32 (47.1%)            |                   | 12 (50%)              |                   |
|                                   | SCC            | 13 (19.1%)            |                   | 7 (29.2%)             |                   |
|                                   | LCC            | 11 (16.2%)            |                   | 2 (8.3%)              |                   |
|                                   | BAC            | 2 (2.9%)              |                   |                       |                   |
|                                   | ND             | 1 (1.5%)              |                   |                       |                   |
|                                   | <b>SCLC</b>    | 9 (13.2%)             |                   | 3 (12.5%)             |                   |
| <b>Stage</b>                      | <b>NSCLC</b>   |                       |                   |                       |                   |
|                                   | I              | 14 (23.7%)            |                   | 5 (23.8%)             |                   |
|                                   | II             | 2 (3.4%)              |                   | 1 (4.8%)              |                   |
|                                   | III            | 15 (25.4%)            |                   | 6 (28.6%)             |                   |
|                                   | IV             | 28 (47.5%)            |                   | 9 (42.9%)             |                   |
|                                   | <b>SCLC</b>    |                       |                   |                       |                   |
|                                   | Limited        | 3 (33.3%)             |                   | 2 (66.6%)             |                   |
| Extended                          | 6 (66.6%)      |                       | 1 (33.3%)         |                       |                   |

Abbreviations: NSCLC=Non Small Cell Lung Cancer, ADC=Adenocarcinoma, SqCC=Squamous Cell Carcinoma, LCC=Large Cell Carcinoma, BAC=Bronchioloalveolar Carcinoma, ND=Not Differentiated Carcinoma, SCLC=Small Cell Lung Cancer, RI=Respiratory Infection, ILD=Interstitial Lung Disease

<sup>a</sup> Gender distribution between cancer and controls statistically significant in the training set:  $P=0.037$  (Fisher test)

<sup>b</sup> Statistically significant differences in age between cancer and controls in the training set:  $P=0.017$  (Mann-Whitney U test)

<sup>c</sup> Smoking status distribution between cancer and controls statistically different:  $P<0.001$  in training set (Fisher test)
